# Supplementary material
Source: PubMed Central journal article supplement (PMC6347707)
Supplement: pnas.1814130116.sapp.pdf [file pnas.1814130116.sapp.pdf]

## Supplementary Information for

The RNA degradosome promotes tRNA quality control through clearance of hypomodified tRNA

Satoshi Kimura and Matthew K. Waldor

Satoshi Kimura

Email: s.kimura.res@gmail.com

Matthew K. Waldor

Email: mwaldor@research.bwh.harvard.edu

### **This PDF file includes:**

Figs. S1 to S7

Tables S1 and S2

Captions for Datasets S1 to S3

References for SI reference citations

### **Other supplementary materials for this manuscript include the following:**

Datasets S1 to S3

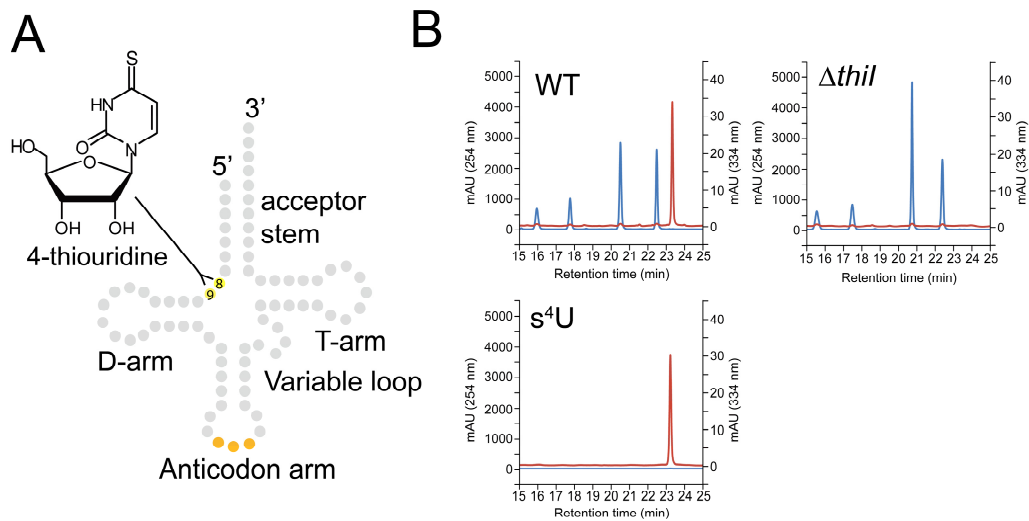

**Fig. S1. ThiI accounts for s<sup>4</sup>U synthesis in *V. cholerae***

(A) Schematic secondary structure of tRNA and chemical structure of 4-thiouridine (s<sup>4</sup>U).

Numbers indicate the positions that are modified to s<sup>4</sup>U. The anticodon is colored in orange.

(B) Chromatograms of HPLC analysis of total nucleosides from wild-type (WT) and  $\Delta$ *thiI* ( $\Delta$ *thiI*)

*V. cholerae* RNA and chemical standard of s<sup>4</sup>U (s<sup>4</sup>U). Blue and red lines represent UV traces at

254 nm and 334 nm, respectively.

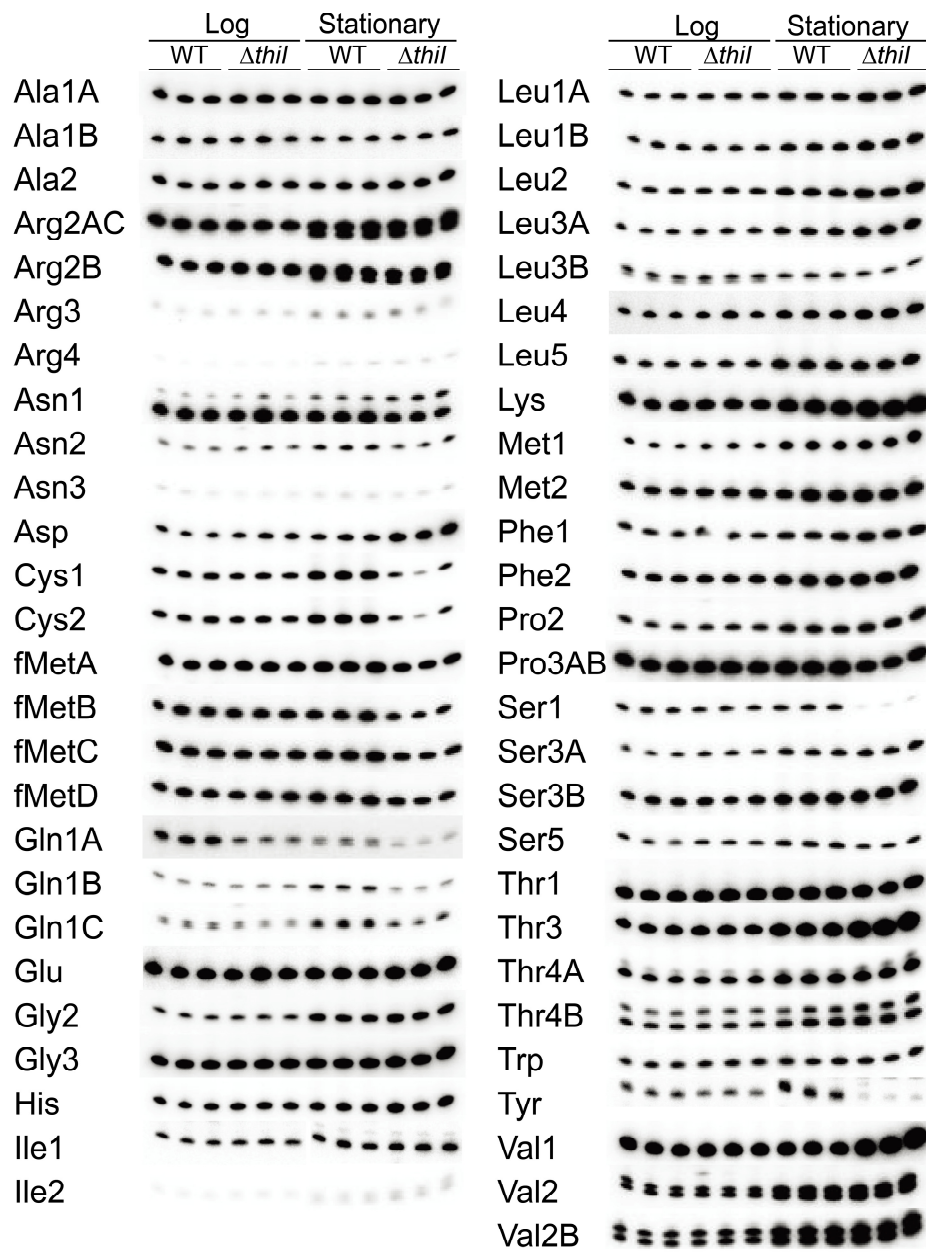

**Fig. S2. Northern blots of all *V. cholerae* tRNA species derived from log and stationary phase cultures; data used for Figure 1B.**

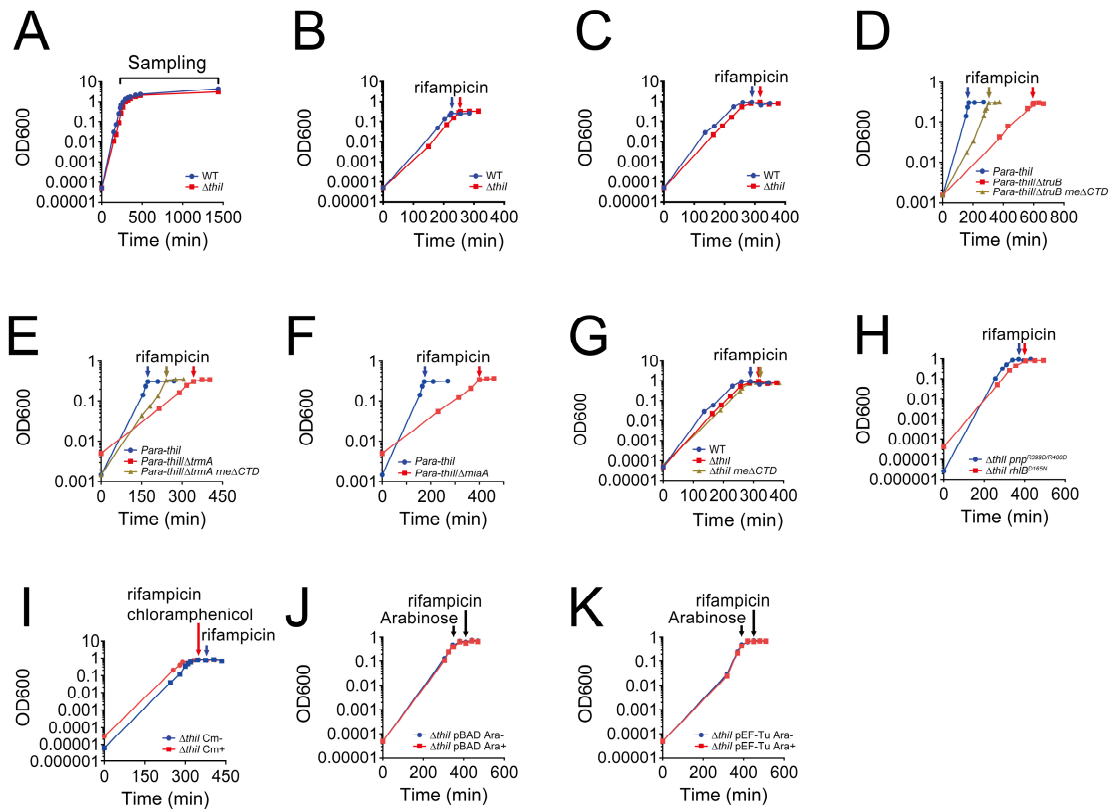

**Fig. S3. Growth curves used for time course and decay measurement experiments (related to Fig. 1, 3, 4 and 6.**

(A) Growth curves (culture OD<sub>600</sub> over time) from time course experiment in Fig. 1D.

(B) Growth curves associated with RNA decay measurements for log phase cultures (Fig. 1E). Rifampicin was added at OD<sub>600</sub> 0.3.

(C) Growth curves associated with RNA decay measurements for stationary phase cultures (Fig. 1F). Rifampicin was added one hour after OD<sub>600</sub> 0.5.

(D-F) Growth curves from decay measurement in log phase (Fig. 3F). Rifampicin was added at OD<sub>600</sub> 0.3.

(G and H) Growth curves from decay measurements in stationary phase (Fig. 4). Rifampicin was added one hour after OD<sub>600</sub> 0.5.

(I) Growth curves from decay measurement in stationary phase (Fig. 6BC). Rifampicin and chloramphenicol (50 µg/ml) was added one hour after OD<sub>600</sub> 0.5.

(J and K) Growth curves from decay measurement in stationary phase (Fig. 6D). Arabinose (0.2 %) was added at OD<sub>600</sub> 0.5 and rifampicin was added one hour after OD<sub>600</sub> 0.5.

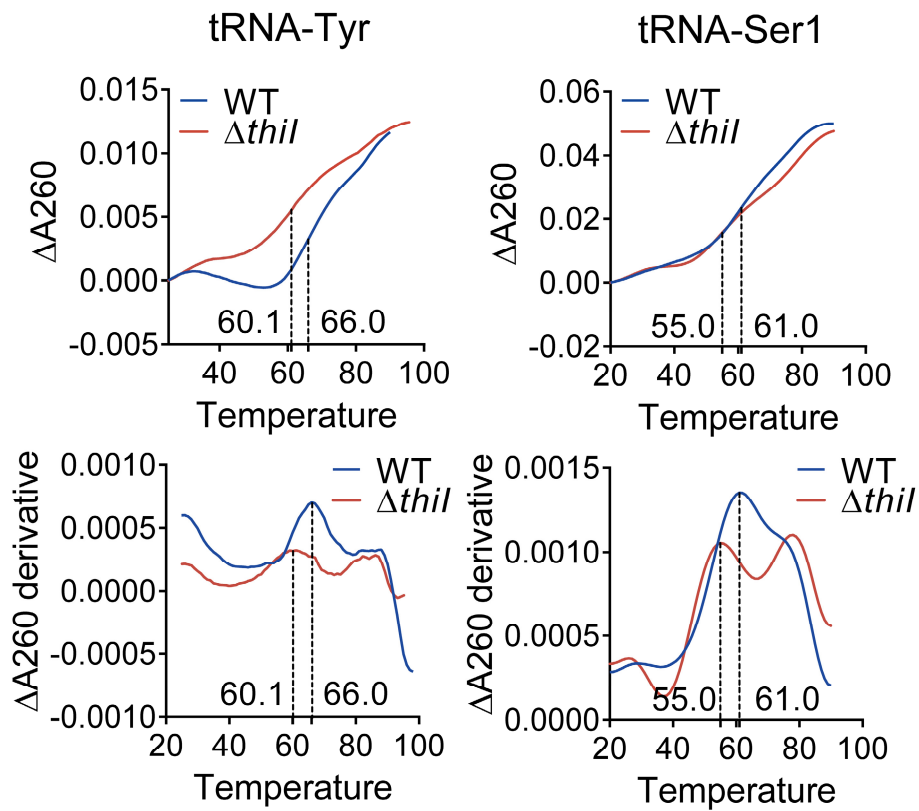

**Fig. S4. Thermodynamic instability of hypomodified tRNA-Tyr and tRNA-Ser1.**

Melting curves and 1<sup>st</sup> derivative curves of tRNA-Tyr and tRNA-Ser1. Upper panels are melting curves and lower panels are 1<sup>st</sup> derivative curves. Melting temperatures were determined by the position of the peak in 1<sup>st</sup> derivative curves.

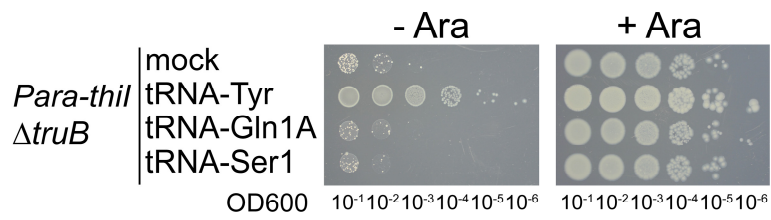

**Fig. S5 Overexpression of tRNA-Gln1A and tRNA-Ser1 does not rescue the growth defect in double mutant.**

Growth of *Para-thiI*/ $\Delta$ *truB* double mutants with multi-copy plasmids encoding the indicated tRNA (expressed from the same promoter) with or without 0.2 % arabinose on LB plates. Plates were incubated at 37 °C for 24 hr.

## tRNA-Tyr

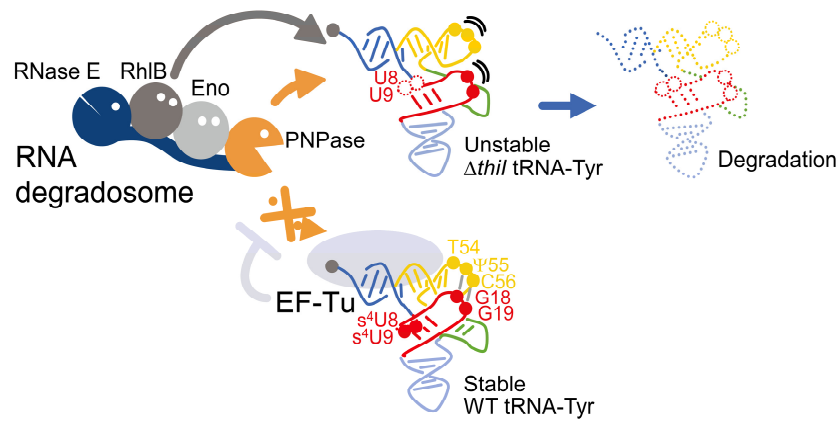

## tRNA-Ser1

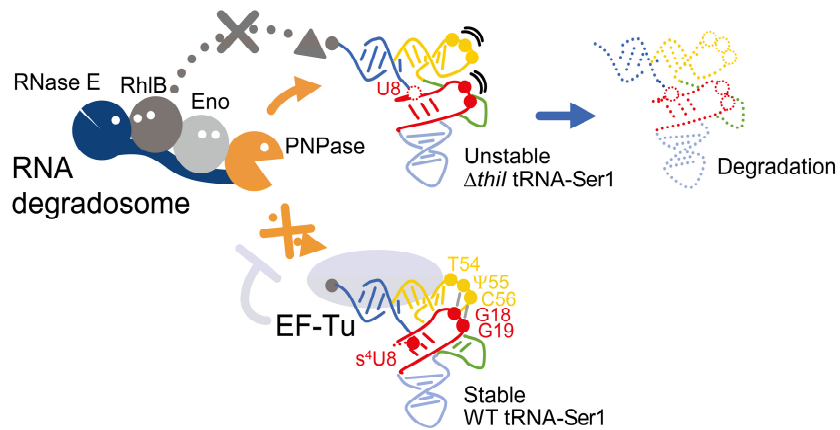

**Fig. S6. Model of distinct tRNA quality control of tRNA-Tyr and tRNA-Ser1 mediated by RNA degradosomes**

WT tRNA form the stable elbow with the base pairings of G18-Ψ55 and G19-C56. <sup>s</sup>4U deficient tRNAs are likely to destabilize the elbow, which could trigger targeting by RNA degradosomes. EF-Tu (gray oval) protects well folded tRNA from the degradosome. PNPases degrade tRNAs from 3' end of hypomodified tRNAs. For tRNA-Tyr degradation, RNA helicase RhlB support the degradation but not for tRNA-Ser1.



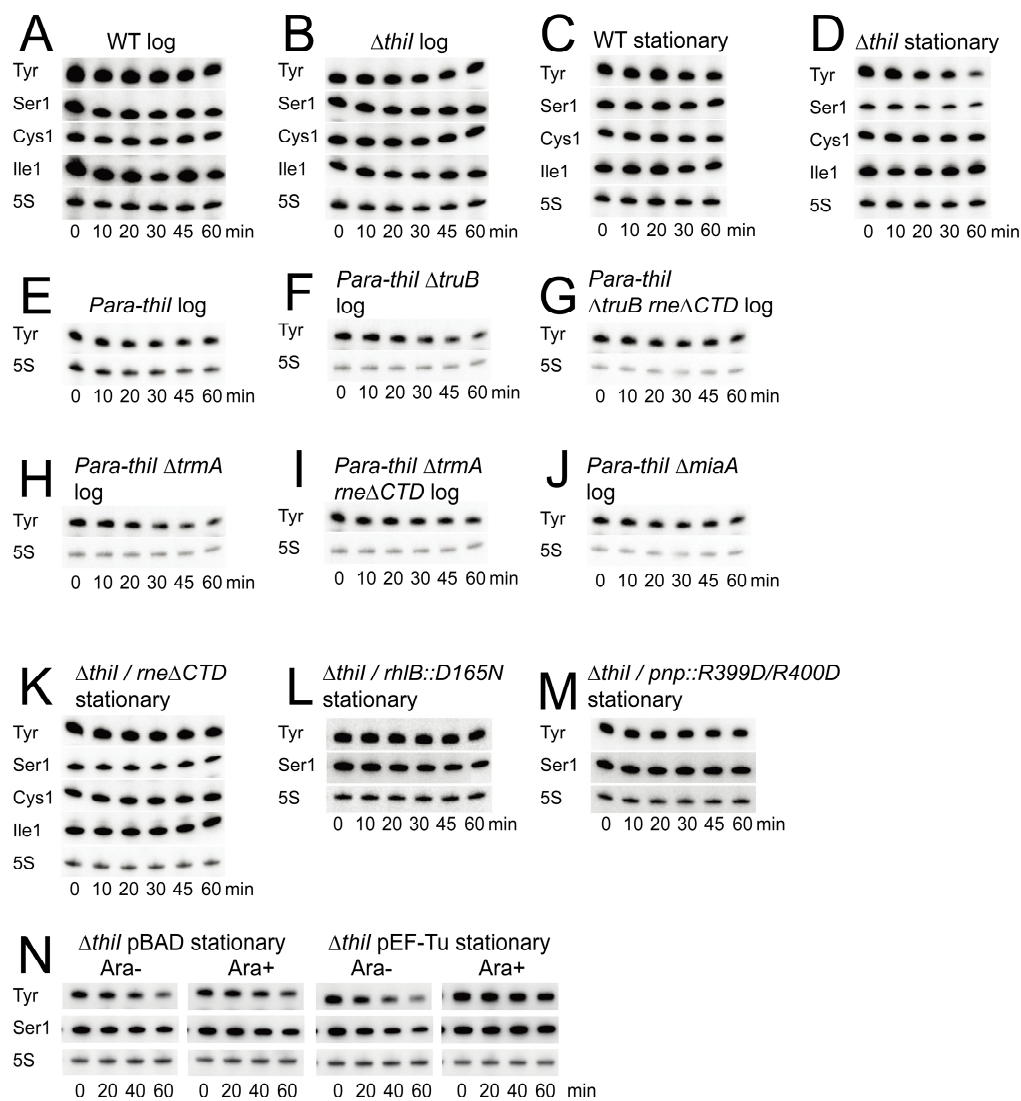

**Fig. S7. Northern blot data.**

(A-M) Northern blot data used to generate the decay curves in Fig. 1E (panel A and B), Fig. 1F (panel C and D), Fig. 3F (panel E-J), Fig. 4 (panel C, D, K-M), Fig 6D (panel N).

### **Supplementary Tables**

**Table S1 Strain list (related to Materials and Methods)**

**Table S2 Plasmid list (related to Materials and Methods)**

### **Supplementary Datasets**

**Dataset S1 Results of Con-Artist (related to Fig. 2A)**

**Dataset S2 Primer list (related to Materials and Methods)**

**Dataset S3 *Vibrio cholerae* tRNA sequences with tRNA names (related to Fig. 1B)**

**Table S1 Strain list (related to methods)**

| <b>Strains</b>                                                                                                 | <b>Relevant genotype/description</b>                                                              | <b>Reference/source</b> |
|----------------------------------------------------------------------------------------------------------------|---------------------------------------------------------------------------------------------------|-------------------------|
| <i>Vibrio cholerae</i>                                                                                         | C6706, wild-type El Tor clinical isolate ( <i>Sm<sup>R</sup></i> )                                | (1)                     |
| <i>V. cholerae</i> $\Delta$ <i>thiI</i>                                                                        | C6706 $\Delta$ <i>vc0894</i>                                                                      | This work               |
| <i>V. cholerae</i> $\Delta$ <i>miaA</i>                                                                        | C6706 $\Delta$ <i>vc0346</i>                                                                      | This work               |
| <i>V. cholerae</i> $\Delta$ <i>trmA</i>                                                                        | C6706 $\Delta$ <i>vc0154</i>                                                                      | This work               |
| <i>V. cholerae</i> $\Delta$ <i>truB</i>                                                                        | C6706 $\Delta$ <i>vc0645</i>                                                                      | This work               |
| <i>V. cholerae</i> <i>Para-thiI</i>                                                                            | C6706 <i>PthiI::araC-Para</i>                                                                     | This work               |
| <i>V. cholerae</i> <i>Para-thiI</i> $\Delta$ <i>trmA</i>                                                       | C6706 <i>Para-thiI</i> $\Delta$ <i>trmA</i>                                                       | This work               |
| <i>V. cholerae</i> <i>Para-thiI</i> $\Delta$ <i>truB</i>                                                       | C6706 <i>Para-thiI</i> $\Delta$ <i>truB</i>                                                       | This work               |
| <i>V. cholerae</i> <i>Para-thiI</i> $\Delta$ <i>miaA</i>                                                       | C6706 <i>Para-thiI</i> $\Delta$ <i>miaA</i>                                                       | This work               |
| <i>V. cholerae</i> <i>Para-thiI</i> $\Delta$ <i>truB</i> suppressor #1                                         | C6706 <i>Para-thiI</i> $\Delta$ <i>truB</i> <i>tRNA-Tyr<sup>U51C</sup></i>                        | This work               |
| <i>V. cholerae</i> <i>Para-thiI</i> $\Delta$ <i>truB</i> suppressor #2                                         | C6706 <i>Para-thiI</i> $\Delta$ <i>truB</i> <i>vc2030<sup>E664*</sup></i>                         | This work               |
| <i>V. cholerae</i> $\Delta$ <i>rne::rne<sup>\Delta(E664-F1052)</sup></i>                                       | C6706 $\Delta$ <i>vc2030::vc2030<sup>\Delta(E664-F1052)</sup></i>                                 | This work               |
| <i>V. cholerae</i> $\Delta$ <i>thiI</i> $\Delta$ <i>rne::rne<sup>\Delta(E664-F1052)</sup></i>                  | C6706 $\Delta$ <i>thiI</i> $\Delta$ <i>rne::rne<sup>\Delta(E664-F1052)</sup></i>                  | This work               |
| <i>V. cholerae</i> <i>Para-thiI</i> $\Delta$ <i>trmA</i> $\Delta$ <i>rne::rne<sup>\Delta(E664-F1052)</sup></i> | C6706 <i>Para-thiI</i> $\Delta$ <i>trmA</i> $\Delta$ <i>rne::rne<sup>\Delta(E664-F1052)</sup></i> | This work               |
| <i>V. cholerae</i> <i>Para-thiI</i> $\Delta$ <i>truB</i> $\Delta$ <i>rne::rne<sup>\Delta(E664-F1052)</sup></i> | C6706 <i>Para-thiI</i> $\Delta$ <i>truB</i> $\Delta$ <i>rne::rne<sup>\Delta(E664-F1052)</sup></i> | This work               |
| <i>V. cholerae</i> <i>Para-thiI</i> $\Delta$ <i>miaA</i> $\Delta$ <i>rne::rne<sup>\Delta(E664-F1052)</sup></i> | C6706 <i>Para-thiI</i> $\Delta$ <i>miaA</i> $\Delta$ <i>rne::rne<sup>\Delta(E664-F1052)</sup></i> | This work               |
| <i>V. cholerae</i> $\Delta$ <i>thiI</i> $\Delta$ <i>pnp::pnp<sup>R399D/R400D</sup></i>                         | C6706 $\Delta$ <i>thiI</i> $\Delta$ <i>pnp::pnp<sup>R399D/R400D</sup></i>                         | This work               |
| <i>V. cholerae</i> $\Delta$ <i>thiI</i> $\Delta$ <i>rhlB::rhlB<sup>D165N</sup></i>                             | C6706 $\Delta$ <i>thiI</i> $\Delta$ <i>rhlB::rhlB<sup>D165N</sup></i>                             | This work               |
| <i>V. cholerae</i> $\Delta$ <i>rne::rne-flag</i>                                                               | C6706 $\Delta$ <i>rne::rne-flag</i>                                                               | This work               |
| <i>V. cholerae</i> $\Delta$ <i>rne::rne-flag</i> $\Delta$ <i>pnp::pnp<sup>R399D/R400D</sup></i>                | C6706 $\Delta$ <i>rne::rne-flag</i> $\Delta$ <i>pnp::pnp<sup>R399D/R400D</sup></i>                | This work               |
| <i>Escherichia coli</i> DH5 $\alpha$ $\lambda$ <i>pir</i>                                                      | Cloning strain                                                                                    |                         |
| <i>Escherichia coli</i> SM10 $\lambda$ <i>pir</i>                                                              | Conjugation donor                                                                                 |                         |

**Table S2 Plasmid list (related to methods)**

| <b>Plasmid</b>                                                 | <b>Relevant genotype/description</b>                                                                             | <b>Reference</b> |
|----------------------------------------------------------------|------------------------------------------------------------------------------------------------------------------|------------------|
| pCVD442                                                        | Allele exchange vector                                                                                           | (2)              |
| pCVD442- $\Delta$ <i>thiI</i>                                  | Allele exchange vector for deletion of <i>V. cholerae</i> <i>vc0894</i>                                          | This work        |
| pCVD442- $\Delta$ <i>trmA</i>                                  | Allele exchange vector for deletion of <i>V. cholerae</i> <i>vc0154</i>                                          | This work        |
| pCVD442- $\Delta$ <i>truB</i>                                  | Allele exchange vector for deletion of <i>V. cholerae</i> <i>vc0645</i>                                          | This work        |
| pCVD442- $\Delta$ <i>miaA</i>                                  | Allele exchange vector for deletion of <i>V. cholerae</i> <i>vc0346</i>                                          | This work        |
| pCVD442- <i>rne</i> <sup><math>\Delta</math>(E664-F1052)</sup> | Allele exchange vector for deletion of C-terminal domain (E664-F1052) of RNase E encoded in <i>vc2030</i>        | This work        |
| pCVD442- <i>ParathiI</i>                                       | Allele exchange vector for replacing <i>V. cholerae</i> <i>PthiI</i> with <i>araC::Para</i> from pBAD33 (Thermo) | This work        |
| pCVD442- <i>pnp</i> <sup>R399D/R400D</sup>                     | Allele exchange vector for mutagenizing <i>pnp</i>                                                               | This work        |
| pCVD442- <i>rhlB</i> <sup>D165N</sup>                          | Allele exchange vector for mutagenizing <i>rhlB</i>                                                              | This work        |
| pCVD442- <i>rne-flag</i>                                       | Allele exchange vector for integrate flag tag to endogenous <i>rne</i>                                           | This work        |
| pSC189                                                         | Himar 1 suicide transposon vector                                                                                | (3)              |
| pACYC184                                                       | Cloning vector                                                                                                   |                  |
| ptRNA-Tyr                                                      | <i>V. cholerae</i> <i>PtRNATyr::tRNATyr</i> on pACYC184                                                          | This work        |
| ptRNA-Gln1A                                                    | <i>V. cholerae</i> <i>PtRNATyr::tRNAGln1A</i> on pACYC184                                                        | This work        |
| ptRNA-Ser1                                                     | <i>V. cholerae</i> <i>PtRNATyr::tRNASer1</i> on pACYC184                                                         | This work        |
| pEF-Tu                                                         | <i>V. cholerae</i> <i>vc0362</i> on pBAD33                                                                       | This work        |

## References

1. Millet YA, *et al.* (2014) Insights into *Vibrio cholerae* intestinal colonization from monitoring fluorescently labeled bacteria. *PLoS pathogens* 10(10):e1004405.
2. Sonnenberg MS & Kaper JB (1991) Construction of an *eae* deletion mutant of enteropathogenic *Escherichia coli* by using a positive-selection suicide vector. *Infection and immunity* 59(12):4310-4317.
3. Chiang SL & Rubin EJ (2002) Construction of a mariner-based transposon for epitope-tagging and genomic targeting. *Gene* 296(1-2):179-185.
